# Supplementary material
Source: PubMed Central journal article supplement (PMC2689960)
Supplement: pp.109.135459_1.pdf [file pp.109.135459_1.pdf]

### **Supplemental Protocol S1. Cryo-FE-SEM:**

A cryo field emission SEM (Hitachi S4300SE/N; Hitachi High Technologies Americas, Inc, Pleasanton, CA) coupled with a cryogenic preparation unit (Emitech K1250X; EmiTECH Inc., Fall River, MA) was used to observe hydrated, frozen, fibers *in situ*. The following steps optimized observation of life-like fibers. (1) The cryo-preparation unit and the cryo-stage inside the SEM specimen chamber were pre-cooled to  $-155^{\circ}\text{C}$ . The protective cold shroud for the cryo-stage was cooled to  $-180^{\circ}\text{C}$ . (2) Bolls of known DPA were excised from plants in a nearby greenhouse, and the pedicel was placed in water. (3) Liquid nitrogen was converted to slush in the cryo-system's freezing chamber (following the manufacturer's instructions). (4) A rectangular window was cut with a scalpel through the boll wall, avoiding damage to underlying fibers. (5) The piece of boll wall was lifted away. (6) At 6 DPA and later when the boll diameter exceeded the height of the preparation chamber, the back half of the boll was cut off with a double-edge razor blade. (7) The back of the boll was adhered to the cryo-system's sample mounting sled, which had been pre-attached to the specimen exchange rod. The adhering agent was pre-mixed carbon paint/OCT solution (1:1, v/v). Products used were PELCO<sup>®</sup> Conductive Graphite (#16051, Ted Pella Inc., Redding, CA) and Tissue-Tek<sup>®</sup> OCT Compound for Cryostat Sectioning (#27050, Ted Pella Inc.). (8) The mounted boll was frozen by plunging into pre-slushed nitrogen. Only one boll was excised from the plant at a time, and less than 10 min elapsed before freezing. After beginning to cut the boll wall, the sample was frozen within 1 min. For subsequent manipulations, the vacuum system was controlled so that the frozen boll was never exposed to air during transfer of the sample mounting sled to the preparation chamber. (9) The stereomicroscope integral to the preparation chamber was used to inspect the fiber surface for ice crystals that formed during freezing and transfer. (10) Any surface ice that had formed during specimen transfer was sublimed away by heating the stage to  $-90^{\circ}\text{C}$ , typically from 20 to 45 min. The time varied according to the age of the boll, since the larger bolls required longer times for the fiber surface to reach sublimation temperature. (11) While the boll was still in the preparation chamber, the sample mounting sled was re-cooled to  $-155^{\circ}\text{C}$  prior to light sputter coating (5 nm of gold-palladium under argon, 20 sec). (12) The still-frozen boll was transferred to the pre-cooled SEM stage. (13) Micrographs were taken under 1 to 2 kV accelerating voltage at 40  $\mu\text{amps}$  beam current, with working distance adjusted appropriately for magnification. The stage was tilted and rotated to optimize the viewing angle of different fiber attributes.

## **Supplemental Protocol S2. Structural analyses and immunolabeling:**

All chemical fixatives were EM grade from either Ladd Research (Hatfield, PA) or Electron Microscopy Sciences (Williston, VT).

*Cryo-fixation and freeze substitution:* Using previously described methods (Salnikov et al., 2003), minimally disturbed fibers still attached to seeds were frozen by plunging in liquid nitrogen-cooled propane within a few minutes of removal through a window cut in the wall of the boll, which was still attached to the plant.

*Chemical fixation methods:* For ultrastructural analysis of cell walls and CFML, a lab microwave (Biowave Model 34700; Pelco Redding, CA) was used with temperature restricted to  $\leq 36.5^{\circ}\text{C}$  during fixation and  $\leq 40^{\circ}\text{C}$  during infiltration. At some steps as specified below, 50.8 cm (20 in) Hg vacuum was applied. As described above, a window was cut in the boll wall, and seeds with attached fiber were carefully lifted from the center of the locule and immersed in 50 mM sodium phosphate buffer (pH 7.2) with 2% (w/v) glutaraldehyde (2 days,  $4^{\circ}\text{C}$ ). Using a microwave, samples were rinsed in the same buffer (250 W, no vacuum, 3 x 1 min), exchanged to aqueous reduced osmium [made just before use by mixing equal volumes of 2% (w/v)  $\text{OsO}_4$  and 3% potassium ferricyanide (w/v)]; microwave-fixed (150W, under vacuum, 1 min), and then kept on ice 20 min. Samples were dehydrated in an acetone series (50, 70, 90, 100%; 250W, no vacuum, 45 sec each step), and infiltrated in Spurr's resin:acetone (1:1, 3:1) followed by 2 x 100% resin (250W with vacuum, 3 min each step). After 3 h rotation in 100% resin (RT), samples were flat-embedded (Salnikov et al., 2003) and polymerized ( $60^{\circ}\text{C}$ , overnight).

For TEM immunolabeling similar to published methods (Ruan et al., 2004), seeds with attached fiber were fixed in 3% (w/v) glutaraldehyde in 25 mM sodium phosphate buffer (pH 7.0) under vacuum for 2 h. After transfer to new fixative, samples were stored overnight at  $4^{\circ}\text{C}$ , then rinsed in the same buffer (3 times, 15 min each). Fibers were secondarily fixed in 1% (w/v)  $\text{OsO}_4$  in the same buffer, and then dehydrated in an EtOH series (30, 50, 70, 90, and 2 x 100%, 1 h each step,  $4^{\circ}\text{C}$ ). Infiltration occurred in two changes of LR White resin:EtOH (1:1, 4 h each) then 3 x 100% resin (first overnight at  $4^{\circ}\text{C}$ , then 4 h at RT, followed by exchange to new resin immediately before flat-embedding). Polymerization occurred under 360 nm UV light (overnight,  $4^{\circ}\text{C}$ ). Because carbohydrate epitopes were the labeling targets, use of  $\text{OsO}_4$  could be tolerated while also providing better preservation of the cytoplasm. Results with and without  $\text{OsO}_4$  were equivalent, and all negative results were confirmed without  $\text{OsO}_4$  (data not shown).

*Sectioning, immunolabeling, and staining prior to TEM observation:* To obtain cross-sections of flat-embedded fibers, a  $\sim 2 \text{ mm}^2$  resin area was cut out with a razor blade and glued vertically onto a blank resin block. Thick sections were made and stained with 1% (w/v, aqueous) Toluidine Blue for preliminary observation in the light microscope. Ultrathin sections for TEM were cut with a diamond knife on an ultramicrotome, collected on Formvar-coated grids, and immunolabeled (if applicable). For immunolabeling, basic solutions used were: 20 mM Tris buffer, pH 8.2, plus 0.02% (w/v) azide (TB); Tris buffered saline (TBS; TB plus 150 mM NaCl, pH 7.5). TB was used in later steps to minimize gold aggregation and non-specific labeling. Thin sections collected on nickel grids were: (a) blocked (30 min, RT, high humidity chamber) in TBS plus 0.06% (w/v) bovine serum albumin (TBS/BSA); (b) incubated (overnight, 4°C) in TBS/BSA with primary antibody (1:3 dilution); (c) washed 3x by dipping grids in TBS; and (d) incubated in TB plus 0.06% (w/v) BSA and 1:30 secondary antibody made in goats (1 h, RT). For JIM5, an anti-rat secondary antibody coupled to 15 nm colloidal gold was used (Electron Microscopy Sciences), and for CCRC-M1 an anti-mouse secondary antibody coupled to 10 nm colloidal gold was used (Amersham Bioscience/GE Healthcare, Piscataway, New Jersey). Grids were then washed in TB and distilled water before staining with 2% (w/v, aqueous) uranyl acetate (15 min) and lead citrate (4 min). Specimens were photographed in the TEM (FEI/Philips EM 208S), and the negatives were scanned at high resolution (Epson 4870 scanner) for preparation of digital plates.

For the antibody 2F4, labeling was performed in a modified buffer, 20 mM Tris-HCl, pH 8.2, containing 0.5 mM  $\text{CaCl}_2$  and 150 mM NaCl according the instructions of Plant Probes (Leeds, UK). Negative results were confirmed in TEM analysis and fluorescence analysis (see below).

*Sectioning and immunolabeling prior to fluorescence observation:* The same results were obtained when semi-thin sections were labeled within 1 to 24 h after sectioning and on samples fixed with (Fig. 4, A to I) and without  $\text{OsO}_4$  (data not shown). Semi-thin (250 nm) sections were cut with an ultramicrotome (Reichert-Jung Ultracut E, Wien, Austria) and mounted on glass slides that had been coated with adhesive (chrome-alum gelatin: 0.5% (w/v) gelatin and 0.05% chromium potassium sulfate). Optionally, sections were pre-treated 60 min with 0.1 M  $\text{Na}_2\text{CO}_3$ . Immunolabeling was performed at room temperature by applying and removing a series of 10  $\mu\text{l}$  droplets as follows. Sections were blocked for 1h in KPBS (0.5 M NaCl in 0.01 M potassium

phosphate, pH 7.1) with 3% (w/v) non-fat dry milk, followed by washing in KPBS (5 min). Primary antibodies (1:5 in blocking solution) were applied and incubated 2 to 2.5 h, followed by washing with KPBS (3 x 5 min each). Secondary antibody (1:100 dilution in KPBS of goat anti-rat IgG conjugated to Alexa Fluor 488, Invitrogen, Carlsbad, CA) was applied and incubated 60 min followed by washing (1 x KPBS, 1 x H<sub>2</sub>O, 5 min each). Final mounting was in an antifade agent (CITIFLUOR AF1; Electron Microscopy Sciences, Hatfield PA).

Sections were photographed at the same exposure time with a digital camera attached to an epi-fluorescence microscope (Eclipse 80i microscope with DS-Ri1 camera head and NIS-Elements Basic Research Software; Nikon, Melville, NY). With an ineffective antibody (2F4) the frames were entirely black, demonstrating that positive signals did not arise from autofluorescence. In order to allow comparison of relative intensity levels between samples, no image processing was performed for Figure 4 A to I. For Figure 4J, image processing to align and superimpose two images was accomplished in Adobe Photoshop CS3. For JIM5 untreated (Fig. 4A), the signal was changed to red and opacity was set to 92%. For JIM5 after Na<sub>2</sub>CO<sub>3</sub> treatment (Fig. 4D), the signal was retained as green and the opacity was retained at 100%. The levels function in Adobe Photoshop was used on the composite image to adjust the brightness for optimum viewing. The composite image was compared to the original to verify that red (or orange or yellow) marked the locations of the original dim signal for JIM5 on untreated sections. An excerpt of the composite image (boxed area in A and D) is shown at high magnification in Figure 4J.

### **Supplemental Protocol S3. Histology of the seed and attached fiber using cryogenic methods:**

Processing in paraffin allowed the sectioning and subsequent observation of entire seeds and attached fibers. Initial freeze substitution allowed the orderly packing of fiber around a 10 DPA seed to be observed, whereas this organization was destroyed in traditional paraffin processing. First, a homemade device for freeze substitution of bulk samples (Grimson and Blanton, 2006) containing fixative [4% (w/v) glutaraldehyde in anhydrous acetone] was pre-cooled to  $-80^{\circ}\text{C}$ . Each sample chamber contained 10 mL fixative over molecular sieves that had been pre-dried overnight at  $400^{\circ}\text{C}$ . A window ( $\sim 1\text{ cm}^2$ ) was cut in the boll wall across the suture line to reveal a locule. The seed and associated fibers were lifted from underneath with a spatula and frozen in melting liquid nitrogen slush (produced by applying a vacuum to a dewar containing liquid nitrogen). Without thawing, the sample was transferred into the  $-80^{\circ}\text{C}$  fixative and left at  $-80^{\circ}\text{C}$  for 14 d. Then fresh fixative (pre-cooled to  $-80^{\circ}\text{C}$ ) was added, followed by another 14 d incubation. After 28 d at  $-80^{\circ}\text{C}$ , the freeze-substitution module was transferred successively to  $-40^{\circ}\text{C}$  (7 d),  $-20^{\circ}\text{C}$  (3 d),  $4^{\circ}\text{C}$  (2 d), and RT (1 d). The seed/fiber packet, which retained its original shape and size, was carefully removed, placed in a covered beaker, and rinsed in 2 x 100% acetone at RT (8 h), followed by acetone:xylene (1:1, v/v; 8 h), and 3 x pure xylene (each 4 h). The sample in xylene was transferred to  $58^{\circ}\text{C}$  oven and allowed to equilibrate. Solid paraffin chips were added progressively to the covered beaker over a 10 d period so that xylene slowly exchanged with paraffin. It was observed that the slow infiltration by the addition of paraffin chips disturbed the delicate spatial integrity fibers much less than decanting one solution and replacing it with the next. After 10 d, the remaining xylene was evaporated over 2 d from the uncovered beaker. The paraffin was then carefully decanted and replaced with fresh liquid paraffin for 1 d ( $58^{\circ}\text{C}$ ), and this process was repeated. A solid paraffin base was created in a peel-away mold, and the seed/fibers were then carefully placed into the mold with a spatula and covered with liquid paraffin. The mold was floated on an ice-water bath, and then plunged under the surface to rapidly cool the sample to prevent the paraffin from cracking.

For microtomy and staining by standard methods (Ruzin 1999), the paraffin block was mounted on a 2.54 cm microtome chuck, end-on, and 12  $\mu\text{m}$  thick sections were taken on a rotary microtome (American Optical Model 820; Tissue-Tek disposable microtome blade, Miles

Inc., Elkhart IN). Ribbons of sections were applied to a layer of 3% formalin on slides pre-coated with Haupt's adhesive and warmed to 52°C to spread the sections. After drying at 52°C overnight, the sections were deparaffinized and stained in a standard histological stain series of 1% (w/v) aqueous Safranin O (12 h) followed by 1% (w/v) Fast Green in 95% EtOH (2 min). After re-exchange to 100% xylene, permanent slides were made by: (a) putting several drops of Preservaslide (MCB Reagents, Cincinnati, OH) on top of the sections; (b) covering with 22 x 60 mm coverslips applied carefully to avoid bubbles; and (c) drying overnight at 52°C with a fishing weight on top.

#### **Supplemental Protocol S4. Analysis of cell wall cellulose and sugars:**

Frozen fiber at 10, 17, 19, 21, and 30 DPA was pulverized under liquid nitrogen and lyophilized. As expected for cotton fiber, starch content was confirmed to be negative by use of the following procedure. Approximately 40 mg dried fiber in pre-weighed 1.5 mL snap-top tubes was extracted 5 x 55 min with 1 mL sterile hot water (65°), with centrifugation to separate supernatant and pellet. The combined hot-water-soluble material was filtered, lyophilized, weighed, resuspended in 1 mL sterile water, and stored at -20°C until further analysis. For starch analysis, 100 µL of fiber extract was diluted in 400 µL water, followed by addition of 20 µL KI solution (0.5% w/v I<sub>2</sub> and 1% w/v KI). No purple color formed from the cotton sample, whereas the reaction was immediate when amylopectin (2mg/mL) was used as a positive control. The insoluble pellet was further extracted with a series of solvents (1 mL each; 2 extractions at each step): cold 80% EtOH, cold 100% EtOH, chloroform: methanol (1:1, v/v), and acetone, followed by centrifugal evaporation. The cell wall pellet was stored at -20°C prior to further analysis.

Crystalline cellulose content was determined by a modification of the Updegraff assay (Updegraff 1969). After organic extraction, 1 to 2 mg dry fiber or 1 to 6 mg Avicel as a standard was boiled 1 h with acetic-nitric reagent. Acid insoluble material was collected by centrifugation, washed (3 x 3 mL in water, 1x in acetone), dried overnight, and hydrolyzed in 1 mL concentrated H<sub>2</sub>SO<sub>4</sub> (1 h, RT, gentle shaking). Released glucose was quantified with anthrone reagent (0.2% w/v anthrone in H<sub>2</sub>SO<sub>4</sub>). Anthrone reagent (750 µL) was added to 400 µL water plus 10 µL cellulose hydrolysate, boiled 5 min, and OD at 620 nm was determined.

Sugars were analyzed as TMS-methylglycoside derivatives, which quantifies both neutral and acidic glycosyl residues in non-cellulosic cell wall matrix polymers (York et al., 1985). Each dried pellet and resuspended hot water soluble extract was aliquoted (~1-4 mg) into glass reaction tubes containing 20 µg inositol as an internal standard. After lyophilization, the sample was hydrolyzed in ~0.5 mL 1 M HCl in anhydrous MeOH (17 h, 80°C) followed by drying in a gentle dry-air stream. Residual HCl was removed by duplicate washing with MeOH and air-drying. TMS-methyl glycosides were created by incubation (80°C, 20 min) with 200 µL Tri-Sil reagent (Pierce/Thermo Fisher Scientific, Inc., Rockford, IL). The derivatized samples were dried under air, resuspended in hexane, filtered through glass wool-packed Pasteur pipettes, air dried, and finally resuspended in 100 µL hexane. Sugar content was analyzed by injecting 2 µL onto a GC-MS system.

## Supplemental Protocol S5. Quantitative real-time reverse-transcription PCR (qPCR):

To generate a large family of target genes, we looked for cotton homologs of Arabidopsis genes that had been classified into cell wall related gene families (<http://cellwall.genomics.purdue.edu/families/index.html>). All the corresponding cotton sequences from the G.h.fbr-sw sequence set (Haigler et al., 2005) were selected as targets, as well as few additional cell-wall-related genes sequenced from other cotton fiber cDNA libraries. Any corresponding longer cotton contigs for target genes were retrieved from a cotton comprehensive gene assembly (<http://agcol.arizona.edu/pave/cotton/>).

In the absence of a fully sequenced *Gossypium* genome, primers were designed using homologous Arabidopsis sequences as a guide in order to minimize the possibility of amplification of closely homologous genes. This strategy was particularly useful because of the close relationship between *Arabidopsis* (Brassicales) and *Gossypium* (Malvales) within Rosids II of the plant phylogenetic tree. The cotton unigenes and their translated sequences were thoroughly compared with the Arabidopsis sequence database to select the unique primer design sites for the closest Arabidopsis homolog that were also shared by the known cotton sequence. Primer Express 3.0 software (Applied Biosystems) was used to design forward and reverse primers (Table S4). The uniqueness of each primer was further confirmed by local Blast against the cotton comprehensive gene assembly. To promote equal amplification, the amplicon size was kept between 50 to 150 base pairs. Although the results show that primers designed in this way can demonstrate developmentally regulated expression corresponding to other data (e.g. for *GhRAC13* and *GhCTL1*, Fig. 5B), it cannot be excluded that, arising from *Gossypium hirsutum* allotetraploidy, more than one closely related gene was amplified.

Total RNA was isolated (Spectrum Plant Total RNA Kit, Sigma-Aldrich, St. Louis, MO) from  $\leq 100$  mg (fresh weight) liquid-nitrogen-pulverized fiber at 6, 10, 15, 19, 20, 21, 22, 23, 26, and 30 DPA. The yield from two extractions at each DPA was combined and then purified of contaminating DNA (On Column DNase Digestion, Sigma-Aldrich). RNA was reverse transcribed by RT-PCR in 20  $\mu$ L “TaqMan Reverse Transcription Reagents” (#N8080234, Applied Biosystems, Foster City, CA). Briefly, 1.0  $\mu$ L oligo (dT)<sub>16</sub> mixture (50  $\mu$ M) was added to 400 ng of total RNA in 0.2 mL PCR strip tubes. The volume was adjusted to 8.7  $\mu$ L with nuclease free water, and then incubated (70°C, 5 min). PCR reactions were set up on ice by addition of 4.0  $\mu$ L dNTP, 2  $\mu$ L buffer (10x), 4.4  $\mu$ L MgCl<sub>2</sub> (20 mM), 0.4  $\mu$ L RNase inhibitor,



and 0.50  $\mu\text{L}$  of reverse transcriptase, followed by mixing and centrifugation. For RT-PCR, the reaction mixtures were incubated ( $25^{\circ}\text{C}$ , 10 min), reverse transcribed ( $48^{\circ}\text{C}$ , 1 h), inactivated ( $95^{\circ}\text{C}$ , 5 min), and cDNA was stored at  $-20^{\circ}\text{C}$ .

In qPCR, *Gheif5* (eukaryotic translation initiation factor-5) was used as an endogenous normalizing gene; it had nearly equal expression in 6 to 30 DPA fiber (data not shown). PCR reaction mixtures [12.5  $\mu\text{L}$  of SYBR green, 150 nM forward and reverse primers (Table S4), 10 ng of cDNA in a total volume of 25  $\mu\text{L}$  adjusted with RNase free water] in 96 well optical plates were briefly vortexed, centrifuged, and loaded into a real time PCR machine (Model 7300; Applied Biosystems). PCR conditions were  $50^{\circ}\text{C}$ , 2 min;  $95^{\circ}\text{C}$ , 10 min; followed by 40 cycles of ( $95^{\circ}\text{C}$ , 20 sec and  $60^{\circ}\text{C}$ , 1 min). Dissociation curves were analyzed to verify the absence of non-specific amplification and primer-dimer formation. Generally, the data were analyzed automatically with the SDS software, but, when necessary, manual adjustments for the baseline and Threshold Cycle (Ct) were made. The Ct values were used to calculate the  $\Delta\text{Ct}$  and  $\Delta\Delta\text{Ct}$  to determine each gene's expression pattern relative to a time of high rate elongation at 10 DPA ( $2^{-\Delta\Delta\text{Ct}}$ ).

### Supplemental Protocol S6. Enzyme activity assays:

$\beta$ -galactosidase activity was measured by hydrolysis of  $\beta$ -D-galactopyranoside (Pressey, 1983). Fiber (~0.08-0.12 g fresh weight) was vortexed in 1.0 mL of 100 mM sodium acetate buffer, pH 4.0, containing 0.5 M NaCl, extracted (15 min, 4°C), centrifuged to clarify (15,000 x g, 5 then 10 min), and stored on ice prior to assay. Enzyme reactions (400  $\mu$ L total volume) were incubated for 0.5 h at 37°C in 62.5 mM sodium acetate buffer containing 0.025% (w/v) bovine serum albumin, 50  $\mu$ L fiber extract, and 3.25 mM  $\beta$ -D-galactopyranoside. Reactions were terminated by addition of 0.2 M sodium carbonate (0.5 mL). The OD arising from the release of p-nitrophenol was measured at 415 nm. A standard curve was prepared from p-nitrophenol (10-50 nmol), and enzyme activity was expressed as  $\mu$ mole p-nitrophenol released  $\text{h}^{-1}$   $\text{mg protein}^{-1}$ .

Activity of XG endo-hydrolase (XEH) was assayed as described with minor modification (Kallas et al., 2005). The reaction mixtures (200  $\mu$ L total volume) contained sodium acetate buffer (75 mM, pH 6.0), 100  $\mu$ L fiber extract (prepared as above), and 100  $\mu$ g of tamarind XG (P-XYGLN, Megazyme International Ireland Ltd, Wicklow, Ireland). After incubation (30°C, 24 h), reactions were terminated by addition of 100  $\mu$ L 1 M HCl. Color development occurred (30 min, RT, dark) after addition of 800  $\mu$ L 20% (w/v)  $\text{Na}_2\text{SO}_4$  and 200  $\mu$ L potassium tri-iodide reagent [1.0% KI (w/v) and 0.5% iodine (w/v) in water]. A standard curve was prepared using 10 to 100  $\mu$ g XG, and decrease in OD at 620 nm indicated XEH activity. Results were expressed as ng XG degraded  $\text{h}^{-1}$   $\text{mg protein}^{-1}$ .

Pectin methylesterase (PME) activity in cotton fibers was quantified as described (Jiang et al., 2005). Fiber (40-50 mg fresh weight) was vortexed in 600  $\mu$ L buffer (0.1 M citric acid, 0.2 M  $\text{NaH}_2\text{PO}_4$ , pH 5.0). Reaction mixtures (800  $\mu$ L total volume) contained 750  $\mu$ g esterified pectin (P-9561, Sigma-Aldrich) and 50  $\mu$ L fiber extract in 0.2 M sodium phosphate buffer (pH 7.0). After 18 h incubation (37°C), color development occurred for 15 min after addition of 200  $\mu$ L 0.5% (w/v) ruthenium red (RT). Each reaction mixture was then mixed with 400  $\mu$ L 0.6 M  $\text{CaCl}_2$ , clarified by centrifugation (15,000 x g, 10 min), and PME activity was expressed as (change in OD at 534 nm)/(mg protein).

**Supplemental Table S1.** Probes used in CoMPP or TEM immunolabeling and qualitative results on immunolabeling intensity.

The qualitative results for intensity of TEM immunolabeling are indicated on a scale of 5 (high) to 0 (not detected) in the last column, with results for 10 and 17 DPA separated by a comma. The notation ‘n.d.’ means that immunolabeling was not performed in this study. Bold type for the antibody name signifies that the antibody also labeled the inner primary wall of cotton fiber. Positive results for JIM7 were demonstrated in the fluorescence microscope (see Figure 4) when semi-thin sections were labeled within 24 h after sectioning. Xyloglucan epitopes (e.g. XLLG) are explained at: <http://cell.cerc.uga.edu/~mao/xyloglc/Xtext.htm#xyloglucan%20-%20composition%20and%20glycosyl%20sequence>.

| <b>Typical polymer recognized</b> | <b>Probe Name</b> | <b>Epitope recognized and/or other information about binding</b> | <b>Source</b>   | <b>CFML immuno-labeling at 10 and 17 DPA</b>               |
|-----------------------------------|-------------------|------------------------------------------------------------------|-----------------|------------------------------------------------------------|
| <b>cellulose</b>                  | CBM3a             | crystalline cellulose                                            | gift of P. Knox | 0                                                          |
| <b>callose</b>                    | BS<br>400-2       | 1,3- $\beta$ -glucan                                             | BioSupplies     | n.d. (see Salnikov et al. 2003)                            |
| <b>Homogalacturonan (HG)</b>      | <b>JIM5</b>       | GalA oligomers, preferring some esters on HG; recognizes DP>7    | CarboSource     | 2, 2                                                       |
|                                   | <b>JIM7</b>       | GalA oligomers, preferring more esters on HG                     | CarboSource     | strongly positive (see immunofluorescence results, Fig. 4) |
|                                   | <b>CCRC-M38</b>   | able to bind fully de-esterified HG; recognizes DP>4             | CarboSource     | 3, 3                                                       |
|                                   | PAM1              | blockwise de-                                                    | Plant Probes    | 0                                                          |

|                                    |                      |                                                        |                                                    |      |
|------------------------------------|----------------------|--------------------------------------------------------|----------------------------------------------------|------|
|                                    |                      | esterified HG                                          |                                                    |      |
|                                    | LM7                  | non-blockwise de-esterified HG                         | Plant Probes                                       | 0    |
|                                    | 2F4 (see note below) | Ca <sup>++</sup> -cross-linked, low esterified HG      | Plant Probes                                       | 0    |
| <b>Xyloglucan (XG)</b>             | <b>anti-XG</b>       | binds non-fucosylated XG, likely the backbone          | gift of L. A. Staehelin (Lynch and Staehelin 1992) | 3, 4 |
|                                    | <b>CCRC-M1</b>       | XXFG; (alpha-Fuc-(1,2)-beta-Gal)                       | CarboSource                                        | 5, 5 |
|                                    | CCRC-M106            | XXFG                                                   | CarboSource                                        | 3, 3 |
|                                    | CCRC-M58             | XLLG                                                   | CarboSource                                        | 2, 2 |
|                                    | CCRC-M100            | XXXG                                                   | CarboSource                                        | 0    |
|                                    | CCRC-M103            | XXXG                                                   | CarboSource                                        | 0    |
|                                    | CCRC-M87             | XLLG, XLXG, XXFG (strong); XXLG (weak)                 | CarboSource                                        | 4, 3 |
|                                    | <b>CCRC-M88</b>      | same as M87                                            | CarboSource                                        | 4, 4 |
|                                    | CCRC-M93             | XLLG (strong); XLXG & XXFG (moderate); XXLG (weak)     | CarboSource                                        | 3, 2 |
|                                    | CCRC-M95             | same as M93                                            | CarboSource                                        | 3, 2 |
|                                    | CCRC-M101            | same as M93                                            | CarboSource                                        | 3, 3 |
|                                    | CCRC-M104            | same as M93                                            | CarboSource                                        | 4, 3 |
| <b>Rhamnogalacturonan I (RG-1)</b> | CCRC-M14             | unbranched regions of RG-1 backbone (no DP dependence, | CarboSource                                        | 0    |

|                                |          |                                                                          |             |      |
|--------------------------------|----------|--------------------------------------------------------------------------|-------------|------|
|                                |          | binds to chain-internal residues)                                        |             |      |
|                                | CCRC-M69 | same as CCRC-M14                                                         | CarboSource | 0    |
|                                | CCRC-M36 | unbranched regions of RG-1 backbone (DP>7), may bind to a free chain end | CarboSource | 0    |
|                                | CCRC-M72 | unbranched regions of RG-1 backbone (DP>5), may bind to a free chain end | CarboSource | 0    |
| <b>RG-1 side chains</b>        | LM5      | 1,4-β-D-galactan                                                         | PlantProbes | 0    |
|                                | LM6      | 1,5-α-L-arabinan                                                         | PlantProbes | 0    |
|                                | LM8      | xylogalacturonan                                                         | PlantProbes | 0    |
|                                | LM9      | feruloylated-(1,4)-β-D-galactan                                          | PlantProbes | n.d. |
|                                | CCRC-M85 | side-chains of RG-1, details not yet determined                          | Carbosource | 0    |
| <b>mannans/galactomannans</b>  | BS 400-4 | 1,4-β-mannan                                                             | BioSupplies | n.d. |
| <b>xylans</b>                  | LM10     | 1,4-β-D-Xyl disaccharide                                                 | PlantProbes | n.d. |
|                                | LM11     | 1,4-β-D-Xyl tetramer                                                     | PlantProbes | n.d. |
| <b>extensin</b>                | LM3      |                                                                          | PlantProbes | n.d. |
| <b>arabinogalactan-protein</b> | LM2      | β-linked glucuronic acid                                                 | PlantProbes | n.d. |

#### Notes on Supplemental Table S1

All probes are monoclonal antibodies, except CBM3a, which is a carbohydrate binding module, and anti-XG, which is a polyclonal antibody. Information about probe specificity was obtained

from: <http://cell.ccruc.uga.edu/~mao/wallmab/Antibodies/antib.htm>; <http://www.plantprobes.net/>;  
the article by Lynch and Staehelin (1992); or for probes still being characterized, by personal communication from Michael Hahn ([hahn@ccrc.uga.edu](mailto:hahn@ccrc.uga.edu)).

Labeling for 2F4 was performed in a modified buffer, 20 mM Tris-HCl, pH 8.2 containing 0.5 mM CaCl<sub>2</sub> and 150 mM NaCl according the instructions of Plant Probes (Leeds, UK). Negative results were confirmed with both TEM and fluorescence microscopy with and without pre-treatment in sodium carbonate.

Sources of Probes Listed in Supplemental Table S1:

BioSupplies, Australia (<http://www.biosupplies.com.au/>)

CarboSource, Athens, GA ([http://www.ccruc.uga.edu/~carbosource/CSS\\_home.html](http://www.ccruc.uga.edu/~carbosource/CSS_home.html))

PlantProbes, Leeds, UK (<http://www.plantprobes.net/>)

Paul Knox (Centre for Plant Sciences, University of Leeds, Leeds LS2 9JT, UK;

[j.p.knox@leeds.ac.uk](mailto:j.p.knox@leeds.ac.uk))

Andrew L. Staehelin (Department of Molecular, Cellular, and Developmental Biology,

University of Colorado, Boulder, Colorado 80309-0347; [staeheli@colorado.edu](mailto:staeheli@colorado.edu))

**Supplemental Table S2.** Sugar analysis of the water insoluble fiber wall matrix fraction

Data for 10 to 30 DPA are expressed as average nmol sugar/mg cotton fiber cell wall. Glucose from fibrillar cellulose was not detected by the methods used.

| <b>DPA</b>                    | <b>10</b> | <b>17</b> | <b>19</b> | <b>21</b> | <b>30</b> |
|-------------------------------|-----------|-----------|-----------|-----------|-----------|
| Arabinose                     | 684.33    | 894.87    | 245.56*   | 296.36*   | 58.16*    |
| <i>SD</i>                     | 418.87    | 46.48     | 92.96     | 106.85    | 28.76     |
| Fucose                        | 32.18     | 63.54     | 23.44*    | 25.89*    | 12.88*    |
| <i>SD</i>                     | 16.66     | 10.84     | 9.57      | 3.06      | 4.99      |
| Galacturonic acid             | 299.37    | 429.82    | 229.41    | 217.94*   | 98.45*    |
| <i>SD</i>                     | 136.18    | 25.77     | 124.69    | 14.98     | 38.35     |
| Galactose                     | 185.91    | 279.56    | 123.89    | 131.45*   | 42.52*    |
| <i>SD</i>                     | 97.26     | 18.72     | 57.48     | 26.58     | 17.33     |
| Glucuronic acid               | 38.22     | 64.97     | 23.06     | 24.48     | 7.43      |
| <i>SD</i>                     | 25.66     | 25.29     | 15.79     | 13.22     | 0.60      |
| Glucose                       | 236.12    | 287.14    | 240.52    | 298.28    | 324.46    |
| <i>SD</i>                     | 219.59    | 76.38     | 137.85    | 175.53    | 77.92     |
| Mannose                       | 20.97     | 26.60     | 27.35     | 57.94     | 4.66*     |
| <i>SD</i>                     | 8.09      | 1.46      | 26.46     | 60.92     | 1.83      |
| Rhamnose                      | 164.19    | 241.72    | 98.81*    | 103.29*   | 33.85*    |
| <i>SD</i>                     | 90.84     | 14.82     | 39.12     | 7.68      | 15.01     |
| Xylose                        | 233.62    | 422.35    | 166.76    | 219.64    | 108.37*   |
| <i>SD</i>                     | 150.11    | 97.97     | 140.76    | 60.12     | 69.52     |
| <b>Total Insoluble Sugars</b> | 1894.91   | 2710.57   | 1178.80   | 1375.27   | 690.78    |

Notes on Supplemental Table S2: SD = standard deviation for means of two independent biological samples (pooled fiber as described in Materials and Methods). Means are based on 2-3 technical replicates for each of two biological samples. Means that were significantly lower compared to 17 DPA ( $p \leq 0.05$ ) are highlighted by an asterisk.

**Supplemental Table S3.** Sugar analysis of the water soluble fiber wall matrix fraction

Data for 10 to 30 DPA are expressed as average nmol sugar/mg cotton fiber cell wall.

| <b>DPA</b>                  | <b>10</b>    | <b>17</b>     | <b>19</b>     | <b>21</b>    | <b>30</b>    |
|-----------------------------|--------------|---------------|---------------|--------------|--------------|
| Arabinose                   | 56.91        | 50.70         | 56.36         | 62.11        | 114.43*      |
| <i>SD</i>                   | <i>1.93</i>  | <i>4.71</i>   | <i>15.51</i>  | <i>12.00</i> | <i>10.67</i> |
| Fucose                      | 4.24         | 0.00          | 1.21          | 3.28         | 4.77         |
| <i>SD</i>                   | <i>2.62</i>  | <i>0.00</i>   | <i>1.71</i>   | <i>1.36</i>  | <i>3.09</i>  |
| Galacturonic acid           | 1.59         | 0.68          | 3.95          | 1.41         | 12.63        |
| <i>SD</i>                   | <i>0.10</i>  | <i>0.96</i>   | <i>0.18</i>   | <i>2.00</i>  | <i>3.61</i>  |
| Galactose                   | 43.19        | 40.65         | 53.45         | 49.52        | 81.18        |
| <i>SD</i>                   | <i>0.03</i>  | <i>4.12</i>   | <i>12.38</i>  | <i>8.10</i>  | <i>23.02</i> |
| Glucuronic acid             | 7.65         | 5.16          | 7.59          | 7.73         | 10.60        |
| <i>SD</i>                   | <i>2.54</i>  | <i>0.79</i>   | <i>3.35</i>   | <i>2.09</i>  | <i>4.25</i>  |
| Glucose                     | 1124.55      | 1296.66       | 1213.25       | 1232.65      | 1221.47      |
| <i>SD</i>                   | <i>20.92</i> | <i>102.69</i> | <i>149.53</i> | <i>53.23</i> | <i>28.90</i> |
| Mannose                     | 13.77        | 11.16         | 11.66         | 10.97        | 18.05*       |
| <i>SD</i>                   | <i>0.52</i>  | <i>0.54</i>   | <i>3.26</i>   | <i>0.39</i>  | <i>1.40</i>  |
| Rhamnose                    | 16.09        | 9.54          | 10.07         | 12.30        | 33.16*       |
| <i>SD</i>                   | <i>0.29</i>  | <i>2.62</i>   | <i>1.58</i>   | <i>3.46</i>  | <i>6.46</i>  |
| Xylose                      | 13.95        | 9.11          | 9.03          | 10.26        | 15.21        |
| <i>SD</i>                   | <i>1.57</i>  | <i>4.93</i>   | <i>0.47</i>   | <i>0.80</i>  | <i>0.27</i>  |
| <b>Total Soluble Sugars</b> | 1281.94      | 1423.66       | 1366.57       | 1390.23      | 1511.50      |

Notes on Supplemental Table S3: SD = standard deviation for means of two independent biological samples (pooled fiber as described in Materials and Methods). Means are based on 1 assay of the two biological samples. Means that were significantly higher compared to 17 DPA ( $p \leq 0.05$ ) are highlighted by an asterisk. (For galacturonic acid, the mean values at 17 and 30 DPA were different with  $p = 0.058$ .)



**Supplemental Table S4.** Primers used to amplify cotton genes in quantitative real-time reverse-transcription PCR

| <b>Cotton Gene Name</b> | <b>Database Accession ID</b> | <b>Forward Primer (5' to 3')</b> | <b>Reverse Primer (5' to 3')</b> |
|-------------------------|------------------------------|----------------------------------|----------------------------------|
| Gheif5                  | CO492947                     | GGTTGCCATTGTGCAAGGA              | CCGTAGGTGAGCGTTAATCAGA           |
| GhCTL1                  | AY291285                     | CCGACCAAGAACGACACGTT             | ACCTCGCCCACAAACTTGAT             |
| GhRAC13                 | S79308                       | GTGAAGGCTGTTTTCGATGCT            | TCTCCTTTTGCAAGGCTTTCTC           |
| GhGH17-C                | Cotton12_04225_01            | CAAAGGCCGGTATTTCTGATG            | ATGCTACGGTGTTCGGTTCAA            |
| GhGH17-B                | Cotton12_00340_02            | GATCTCTCTGAAGTGCCAAATCAC         | TCCTTTTGCTCCAATTGCATT            |
| GhGH17-D                | Cotton12_23061_01            | CAGCACGGATACTTGTCAATGC           | CAGGAATAATCGACGAAGCAAGA          |
| Ghbglu46                | Cotton12_18238_01            | TGCTGTTGACAGTGCATCTAAGTG         | GAAAACGGATACGGTGATGTGA           |
| GhGH3-a/                |                              |                                  |                                  |
| GhGH3-b                 | Cotton12_00002_02            | AACGGATTACTCGGCATCCA             | CGGTCACAAGATCGTGATTAGC           |
| Ghbgal1                 | Cotton12_07638_01            | GCTAATCGCAGGAAGAATCAGTAGA        | CCTTCACGGAAGTTTCCACAA            |
| Ghbgal12                | Cotton12_34622_01            | CCGGTGTCCCATGGATTATG             | ATTGGGAGTGAAGTTTTCGCAGTA         |
| Ghbgal8                 | Cotton12_15125_01            | AGTTGCCCATCTCCGAATCA             | ACACCTCCCATGGCTAAAACCTG          |
| Ghbgal9                 | Cotton12_10595_01            | TACGTGTGCCTCGAATTCTCTGT          | TCTGTGGTTTCATGTCACTTATGGA        |
| Ghexpa4                 | Cotton12_13766_01            | ATATCGTGAAGGTGAGCGTGAA           | GATTGACCAACCAAACTGCATT           |
| Ghexpa6                 | Cotton12_11024_01            | GAATATCGTGAAGGCTAGTGTGAAAG       | ACTGCCTGTGACCCCTAAATGAGA         |
| GhEXP1,<br>expansin     | AF512539, AY189969           | CCGTGACAGCCACCAACTTT             | TTCTGCTATCCGCAAGAATGC            |
| Ghexpla2                | DR463856                     | ATAAATAACCCCAATTTTCCAATCAG       | GTCCCAAATGGTGCCTTACAA            |
| Ghpae-a                 | Cotton12_16483_01            | GGATGCTGTTGATCGAGCTAATAA         | GCATTTCTCATTCTTTTGCTAGTAGA       |
| Ghpae-b                 | Cotton12_00006_01            | CCCAGTGCTGCTGACAAAAG             | TGTTCAAGGGCACTTAAGAATTGC         |
| Ghpae-c                 | Cotton12_00013_10            | GCTCGATGCCGTA AAAATATTCTC        | CTGCAATTCCTTGTTCCTCAA            |
| Ghpe-E                  | CO495780                     | ACCGACCCAAACCAGAACAC             | TCCATGGCCTCCCTAGATATGT           |
| Ghpe-D1                 | DR460940                     | TTGGTGACGCCTCCGTAGTAT            | GGGTCTTCCGGCCTTGT                |
| Ghpe-D2                 | Cotton12_00620_02            | CGGTTTCCGGTATGGTTCAA             | TGAAATCCCCTCCCTATCTG             |
| Ghpe-D3                 | DR461911                     | GGGAGGGATTCATAGCGAAAG            | AGAGGTCTGACCCACTCCTTAAAG         |
| Ghpg-A1                 | Cotton12_36589_01            | TGCTACATATGTGTTGGCGATGA          | GCACTGACCATAGAACGGACAA           |
| Ghpg-A2                 | Cotton12_41244_01            | ACGTAACGGCGATCAATACAGA           | CTTCATCGTATTCAACGTCATGTTT        |
| Ghpg-A3                 | CO492632                     | CCGCAGAGAGCTTTACGAGTCT           | ATTCCAGTGTGCCTTCGTTGA            |
| Ghpl-A1                 | Cotton12_00006_05            | GGTCCGAAGGAGACTTGTTACTGA         | AGCACCAGCATTGGAAGTCAT            |
| Ghpl-A2                 | Cotton12_13918_01            | TGCACCAGAGAGTGAAGTGGAA           | GCTCGAAGCCTTGGAAATAGCT           |
| Ghrhgl                  | Cotton12_28336_01            | GAAGAATTAATGCAGGCGCAAT           | ACGGCCAGTGTGTTTGTTC              |
| Ghxth28                 | Cotton12_00034_02            | TTTTTCGTCGAAGAAGTGTGATACC        | CTGGTCTGGTCATAGCAGTAGGAA         |
| Ghxth29                 | Cotton12_27571_01            | CTCTTTCCATCCTCGCTTGCT            | CCCGAGTGCGCAGTTGAT               |
| Ghxth30                 | Cotton12_37078_01            | GCGATGGCAATCTTGTTCTG             | GCACTGAAAAATCCATGTTGATACA        |
| Ghxth6                  | Cotton12_26335_01            | GGAACCATCATCATATTGCGTTT          | TTGGGTATGGGATGTTTTTTC            |
| Ghxth7                  | Cotton12_06611_01            | ACAAGGACTTCGACATTGAAGGA          | TGGCATTAAAGGGCTTGATAAGC          |

#### Notes for Supplemental Table S4

Accession IDs beginning with Cotton\_12 derive from

[http://agcol.arizona.edu/cgi-bin/pave/adv\\_search.cgi?AssemblyID=Cotton12](http://agcol.arizona.edu/cgi-bin/pave/adv_search.cgi?AssemblyID=Cotton12).

Others derive from <http://www.ncbi.nlm.nih.gov/>.

#### Abbreviations:

Gh--*Gossypium hirsutum*, GH--glycosyl hydrolase, with the following number indicating the family

#### Cotton Gene Name System:

Upper case indicates an official name for a cotton gene.

Lower case gene name with number: adopted from the closest Arabidopsis homolog with that name, as shown at TAIR ([www.arabidopsis.org](http://www.arabidopsis.org)) and/or <http://cellwall.genomics.purdue.edu>.

Lower case gene name with letter or letter plus number: gene shows homology to an unnamed Arabidopsis gene of that (putative) type.

**Supplementary Table S5:** Expression patterns for cotton genes in fiber, 6 to 30 DPA, determined by quantitative real-time reverse-transcription PCR (qPCR).

| Cotton Gene Name                  | Database Accession ID for cotton sequence | Closest Arabidopsis Homologue | E value, cotton vs. Arabidopsis | Description for Arabidopsis at <a href="http://www.arabidopsis.org">www.arabidopsis.org</a> and/or <a href="http://cellwall.genomics.purdue.edu">http://cellwall.genomics.purdue.edu</a> |
|-----------------------------------|-------------------------------------------|-------------------------------|---------------------------------|------------------------------------------------------------------------------------------------------------------------------------------------------------------------------------------|
| <b>GhCTL1</b>                     | AY291285                                  | At3g16920                     | 1.00E-153                       | chitinase, similar to chitinase-like protein                                                                                                                                             |
| <b>GhRAC13</b>                    | S79308                                    | At5g45970                     | 3.00E-91                        | ARAC2/ROP7, Rac-like (ROP GTPase family)                                                                                                                                                 |
| <i>GhGH17-C</i>                   | Cotton12_04225_01                         | At2g16230                     | 0                               | glycosyl hydrolase family 17 (group C)                                                                                                                                                   |
| <i>GhGH17-B</i>                   | Cotton12_00340_02                         | At4g17180                     | 1.00E-115                       | glycosyl hydrolase family 17 (group B)                                                                                                                                                   |
| <i>GhGH17-D</i>                   | Cotton12_23061_01                         | At1g66250                     | 8.00E-41                        | glycosyl hydrolase family 17 (group D)                                                                                                                                                   |
| <i>Ghbglu46</i>                   | Cotton12_18238_01                         | At1g61820                     | 9.00E-91                        | BGLU46, beta-glucosidase                                                                                                                                                                 |
| <i>GhGH3-a/</i><br><i>GhGH3-b</i> | Cotton12_00002_02                         | At5g20940<br>At5g20950        | 0                               | glycosyl hydrolase family 3                                                                                                                                                              |
| <i>Ghbgal1</i>                    | Cotton12_07638_01                         | At3g13750                     | 0                               | BGAL1, beta-galactosidase / lactase                                                                                                                                                      |
| <b>Ghbgal12</b>                   | Cotton12_34622_01                         | At4g26140                     | 1.00E-131                       | BGAL12, beta-galactosidase / lactase                                                                                                                                                     |
| <i>Ghbgal8</i>                    | Cotton12_15125_01                         | At2g28470                     | 0                               | BGAL8, beta-galactosidase / lactase                                                                                                                                                      |
| <i>Ghbgal9</i>                    | Cotton12_10595_01                         | At2g32810                     | 1.00E-55                        | BGAL9, beta-galactosidase / lactase                                                                                                                                                      |
| <i>Ghexpa4</i>                    | Cotton12_13766_01                         | At2g39700                     | 8.00E-84                        | EXPA4, expansin (alpha group)                                                                                                                                                            |
| <i>Ghexpa6</i>                    | Cotton12_11024_01                         | At2g28950                     | 1.00E-134                       | EXPA6, expansin (alpha group)                                                                                                                                                            |
| <i>GhEXP1,</i><br><i>expansin</i> | AF512539 AY189969                         | At2g40610                     | 1.00E-104<br>1.00E-111          | EXPA8, expansin (alpha group)                                                                                                                                                            |
| <i>Ghexpla2</i>                   | DR463856                                  | At4g38400                     | 6.00E-69                        | EXPLA2, expansin family                                                                                                                                                                  |
| <i>Ghpae-a</i>                    | Cotton12_16483_01                         | At5g45280                     | 4.00E-68                        | pectinacylesterase                                                                                                                                                                       |
| <i>Ghpae-b</i>                    | Cotton12_00006_01                         | At4g19410                     | 1.00E-154                       | pectinacylesterase                                                                                                                                                                       |
| <b>Ghpae-c</b>                    | Cotton12_00013_10                         | At2g46930                     | 1.00E-170                       | pectinacylesterase                                                                                                                                                                       |
| <b>Ghpe-E</b>                     | CO495780                                  | At2g45220                     | 8.00E-87                        | pectinesterase family (group E)                                                                                                                                                          |
| <i>Ghpe-D1</i>                    | DR460940                                  | At4g33220                     | 3.00E-48                        | pectinesterase family (group D)                                                                                                                                                          |
| <i>Ghpe-D2</i>                    | Cotton12_00620_02                         | At3g43270                     | 0                               | pectinesterase family (group D)                                                                                                                                                          |
| <i>Ghpe-D3</i>                    | DR461911                                  | At4g02300                     | 1.00E-56                        | pectinesterase family (group D)                                                                                                                                                          |
| <b>Ghpg-A1</b>                    | Cotton12_36589_01                         | At1g19170                     | 1.00E-101                       | polygalacturonase (pectinase) family (group A)                                                                                                                                           |
| <i>Ghpg-A2</i>                    | Cotton12_41244_01                         | At4g23500                     | 5.00E-74                        | polygalacturonase (pectinase) family (group A)                                                                                                                                           |
| <b>Ghpg-A3</b>                    | CO492632                                  | At3g42950                     | 4.00E-33                        | polygalacturonase (pectinase) family (group A)                                                                                                                                           |
| <i>Ghpl-A1</i>                    | Cotton12_00006_05                         | At1g04680                     | 0                               | pectate lyase family (group A)                                                                                                                                                           |
| <i>Ghpl-A2</i>                    | Cotton12_13918_01                         | At1g67750                     | 0                               | pectate lyase family (group A)                                                                                                                                                           |
| <i>Ghrhgl</i>                     | Cotton12_28336_01                         | At2g22620                     | 9.00E-49                        | rhamnogalacturonan 1 lyase                                                                                                                                                               |
| <i>Ghxth28</i>                    | Cotton12_00034_02                         | At1g14720                     | 1.00E-136                       | XTH28, xyloglucan endotransglycosylase                                                                                                                                                   |
| <i>Ghxth29</i>                    | Cotton12_27571_01                         | At4g18990                     | 2.00E-14                        | XTH29, xyloglucan endotransglycosylase                                                                                                                                                   |
| <b>Ghxth30</b>                    | Cotton12_37078_01                         | At1g32170                     | 3.00E-71                        | XTH30/XTR4; xyloglucan endotransglycosylase                                                                                                                                              |
| <b>Ghxth6</b>                     | Cotton12_26335_01                         | At5g65730                     | 1.00E-101                       | XTH6, xyloglucan endotransglycosylase                                                                                                                                                    |
| <i>Ghxth7</i>                     | Cotton12_06611_01                         | At4g37800                     | 1.00E-135                       | XTH7, xyloglucan endotransglycosylase                                                                                                                                                    |

Repeat  
Cotton Gene  
Name

Gene expression level at 6 to 30 DPA relative to 10 DPA (linear scale)

|                     | <u>6</u> | <u>10</u> | <u>15</u>   | <u>19</u> | <u>20</u>   | <u>21</u>    | <u>22</u>    | <u>23</u>       | <u>26</u> | <u>30</u>      |
|---------------------|----------|-----------|-------------|-----------|-------------|--------------|--------------|-----------------|-----------|----------------|
| <b>GhCTL1</b>       | 0.45     | 1         | 1.22        | 53.43     | 28.00       | 385.13       | 2510.08      | 3803.63         | 3373.26   | <b>4269.46</b> |
| <b>GhRAC13</b>      | 0.38     | 1         | 3.10        | 4.69      | 6.24        | <b>9.83</b>  | 9.19         | 4.67            | 3.41      | 2.17           |
| GhGH17-C            | 0.38     | 1         | 0.44        | 0.20      | 0.26        | 0.31         | 0.12         | 0.11            | 0.06      | 0.01           |
| GhGH17-B            | 0.63     | 1         | 1.15        | 1.19      | 1.37        | 2.06         | 3.26         | 3.97            | 3.52      | <b>4.13</b>    |
| GhGH17-D            | 0.88     | 1         | 0.94        | 1.02      | <b>2.00</b> | 1.39         | 0.34         | 0.22            | 0.19      | 0.11           |
| Ghbglu46            | 0.41     | 1         | 3.79        | 7.13      | 10.94       | 20.22        | <b>22.28</b> | 12.17           | 5.93      | 6.41           |
| GhGH3-a/<br>GhGH3-b | 0.82     | 1         | 0.34        | 0.10      | 0.06        | 0.06         | 0.03         | 0.01            | 0.01      | 0.01           |
| Ghbgal1             | 0.33     | 1         | 1.57        | 1.65      | 2.18        | <b>2.31</b>  | 1.26         | 1.17            | 0.85      | 0.77           |
| <b>Ghbgal12</b>     | 0.69     | 1         | 1.65        | 2.00      | 4.16        | <b>4.22</b>  | 1.72         | 1.09            | 1.22      | 0.98           |
| Ghbgal8             | 0.96     | 1         | 0.53        | 0.73      | 1.84        | 2.91         | 3.80         | <b>4.48</b>     | 3.61      | 3.95           |
| Ghbgal9             | 0.57     | 1         | 0.88        | 1.11      | 1.60        | <b>2.04</b>  | 1.67         | 1.90            | 1.30      | 1.07           |
| Ghexpa4             | 0.41     | 1         | <b>1.54</b> | 0.38      | 0.28        | 0.11         | 0.02         | 0.01            | 0.00      | 0.00           |
| Ghexpa6             | 0.06     | 1         | 2.04        | 2.81      | <b>2.91</b> | 1.69         | 0.15         | 0.04            | 0.04      | 0.00           |
| GhEXP1,<br>expansin | 0.49     | 1         | <b>1.07</b> | 0.83      | 1.03        | 1.00         | 0.45         | 0.30            | 0.10      | 0.03           |
| Ghexpla2            | 0.25     | 1         | 0.08        | 0.07      | 0.12        | 0.17         | 0.08         | 0.10            | 0.05      | 0.05           |
| Ghpae-a             | 0.31     | 1         | 1.61        | 1.05      | 1.97        | <b>2.64</b>  | 1.24         | 0.63            | 0.56      | 0.23           |
| Ghpae-b             | 0.30     | 1         | 1.42        | 0.86      | 1.37        | <b>2.06</b>  | 1.18         | 0.65            | 0.49      | 0.22           |
| <b>Ghpae-c</b>      | 0.47     | 1         | 1.19        | 4.94      | 11.88       | <b>16.45</b> | 16.26        | 11.77           | 5.83      | 4.91           |
| <b>Ghpe-E</b>       | 0.34     | 1         | 0.95        | 272.42    | 4228.91     | 11961.14     | 30071.09     | <b>40983.89</b> | 23268.25  | 16644.55       |
| Ghpe-D1             | 0.78     | 1         | 0.45        | 0.07      | 0.06        | 0.07         | 0.02         | 0.02            | 0.01      | 0.01           |
| Ghpe-D2             | 0.31     | 1         | <b>3.10</b> | 1.53      | 1.39        | 0.97         | 0.08         | 0.03            | 0.02      | 0.00           |
| Ghpe-D3             | 0.52     | 1         | 0.74        | 0.29      | 0.29        | 0.35         | 0.05         | 0.00            | 0.02      | 0.00           |
| <b>Ghpg-A1</b>      | 0.79     | 1         | 0.89        | 3.05      | 8.48        | <b>13.36</b> | 10.15        | 6.16            | 3.78      | 4.02           |
| Ghpg-A2             | 0.27     | 1         | 0.95        | 0.62      | <b>1.58</b> | 1.43         | 0.34         | 0.14            | 0.06      | 0.02           |
| <b>Ghpg-A3</b>      | 0.78     | 1         | 1.09        | 2.73      | 12.04       | 30.41        | <b>51.39</b> | 38.06           | 24.76     | 13.70          |
| Ghpl-A1             | 0.32     | 1         | <b>1.33</b> | 0.89      | 1.02        | 0.99         | 0.17         | 0.05            | 0.01      | 0.00           |
| Ghpl-A2             | 0.33     | 1         | 1.04        | 1.43      | 2.36        | <b>2.37</b>  | 0.84         | 0.18            | 0.05      | 0.00           |
| Ghrhgl              | 0.62     | 1         | 0.52        | 0.13      | 0.23        | 0.29         | 0.11         | 0.03            | 0.06      | 0.13           |
| Ghxth28             | 0.23     | 1         | 2.93        | 10.98     | 21.86       | <b>30.56</b> | 17.27        | 23.75           | 25.16     | 34.46          |
| Ghxth29             | 0.19     | 1         | 3.15        | 12.10     | 23.48       | <b>24.14</b> | 10.70        | 8.73            | 6.12      | 5.06           |
| <b>Ghxth30</b>      | 0.15     | 1         | 4.09        | 14.19     | 36.34       | <b>47.62</b> | 16.68        | 11.52           | 9.19      | 5.19           |
| <b>Ghxth6</b>       | 0.13     | 1         | 4.32        | 14.98     | 15.51       | <b>28.61</b> | 19.12        | 17.63           | 10.31     | 5.48           |
| Ghxth7              | 0.51     | 1         | 1.05        | 1.43      | 1.16        | <b>2.06</b>  | 1.51         | 1.42            | 0.95      | 0.55           |

### Notes for Supplementary Table S5

Putative classes for translated cotton sequences were assigned by homology to Arabidopsis sequences classified the same way (<http://www.arabidopsis.org> and/or <http://cellwall.genomics.purdue.edu>).

Data were normalized to the endogenous control, *G. hirsutum eif5* (eukaryotic translation initiation factor-5, GenBank Accession: CO492947). *Gheif5* had nearly constant expression in 6 - 30 DPA fiber.

**Bold gene name** indicates gene expression profiles shown graphically in the manuscript

Accession IDs beginning with Cotton\_12 derive from [http://agcol.arizona.edu/cgi-bin/pave/adv\\_search.cgi?AssemblyID=Cotton12](http://agcol.arizona.edu/cgi-bin/pave/adv_search.cgi?AssemblyID=Cotton12). Others derive from <http://www.ncbi.nlm.nih.gov/>.

Two Arabidopsis IDs associated with one cotton sequence indicates equal homology to both.

**Bold** indicates maximum expression ratio for each gene relative to its own value at 10 DPA.

Abbreviations:

Gh: *Gossypium hirsutum*

GH: glycosyl hydrolase, with the following number indicating the family

Cotton Gene Name System:

Upper case indicates an official name for a cotton gene

Lower case gene name with number: adopted from the closest Arabidopsis homolog with that name, as shown at TAIR ([www.arabidopsis.org](http://www.arabidopsis.org)) and/or <http://cellwall.genomics.purdue.edu>

Lower case gene name with letter or letter plus number: gene shows homology to an unnamed Arabidopsis gene of that (putative) type

**Supplemental Table S6.** Activities of cell wall modifying enzymes  
in cotton fiber between 10 to 30 DPA

The enzymes assayed were galactosidase, xyloglucan endo-hydrolase (XEH), and pectin methylesterase (PME).

| DPA | galacto-<br>sidase <sup>1</sup> | <i>SE</i> | XEH <sup>2</sup> | <i>SE</i> | PME <sup>3</sup> | <i>SE</i> |
|-----|---------------------------------|-----------|------------------|-----------|------------------|-----------|
| 10  | 23.26                           | 1.59      | 62.22            | 3.77      | 8.17             | 1.03      |
| 15  | 21.29                           | 0.88      | 100.93           | 6.69      | 13.98            | 0.60      |
| 19  | 24.53                           | 1.15      | 127.98           | 4.93      | 21.72            | 1.54      |
| 20  |                                 |           |                  |           | 18.41            | 0.96      |
| 21  | 31.20                           | 0.64      | 87.16            | 6.43      |                  |           |
| 23  | 34.36                           | 1.33      | 12.79            | 2.57      | 69.58            | 4.21      |
| 26  | 28.64                           | 1.23      | 3.57             | 1.25      |                  |           |
| 30  | 28.95                           | 0.57      | 0.00             | 0.00      | 85.52            | 7.16      |

Notes for Supplemental Table S6

Units of activity are indicated by superscripts:

<sup>1</sup> p-nitrophenol released ( $\mu\text{ mol hr}^{-1}\text{ mg}^{-1}$  soluble protein)

<sup>2</sup> XG degradation ( $\text{ng h}^{-1}\text{ mg}^{-1}$  soluble protein)

<sup>3</sup> Pectin demethylation ( $\Delta\text{OD}_{534\text{ nm}}/\text{mg}$  soluble protein)

Means are the average of 4 biological replications; SE = standard error.

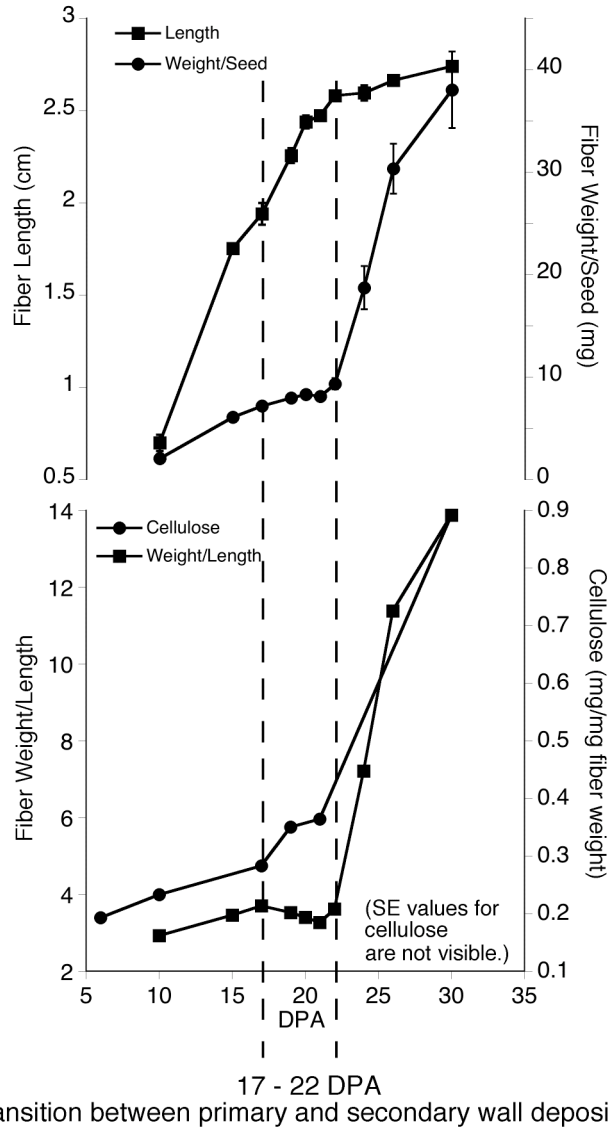

**Figure S1.** Fiber growth and cellulose accumulation from 6 to 30 DPA for *G. hirsutum* cv. Deltapine 90 grown in July a tightly controlled greenhouse with a 26°C/22°C day/night temperature cycle. The top graph shows fiber length (cm) and fiber dry weight/seed (mg). The bottom graph shows cellulose content (mg/mg fiber dry weight) and fiber weight/length. The sharp increase in fiber weight/length after 22 DPA is due to deposition of secondary wall cellulose. Under these conditions, the transition between primary and secondary wall deposition occurs between 17 to 22 DPA.

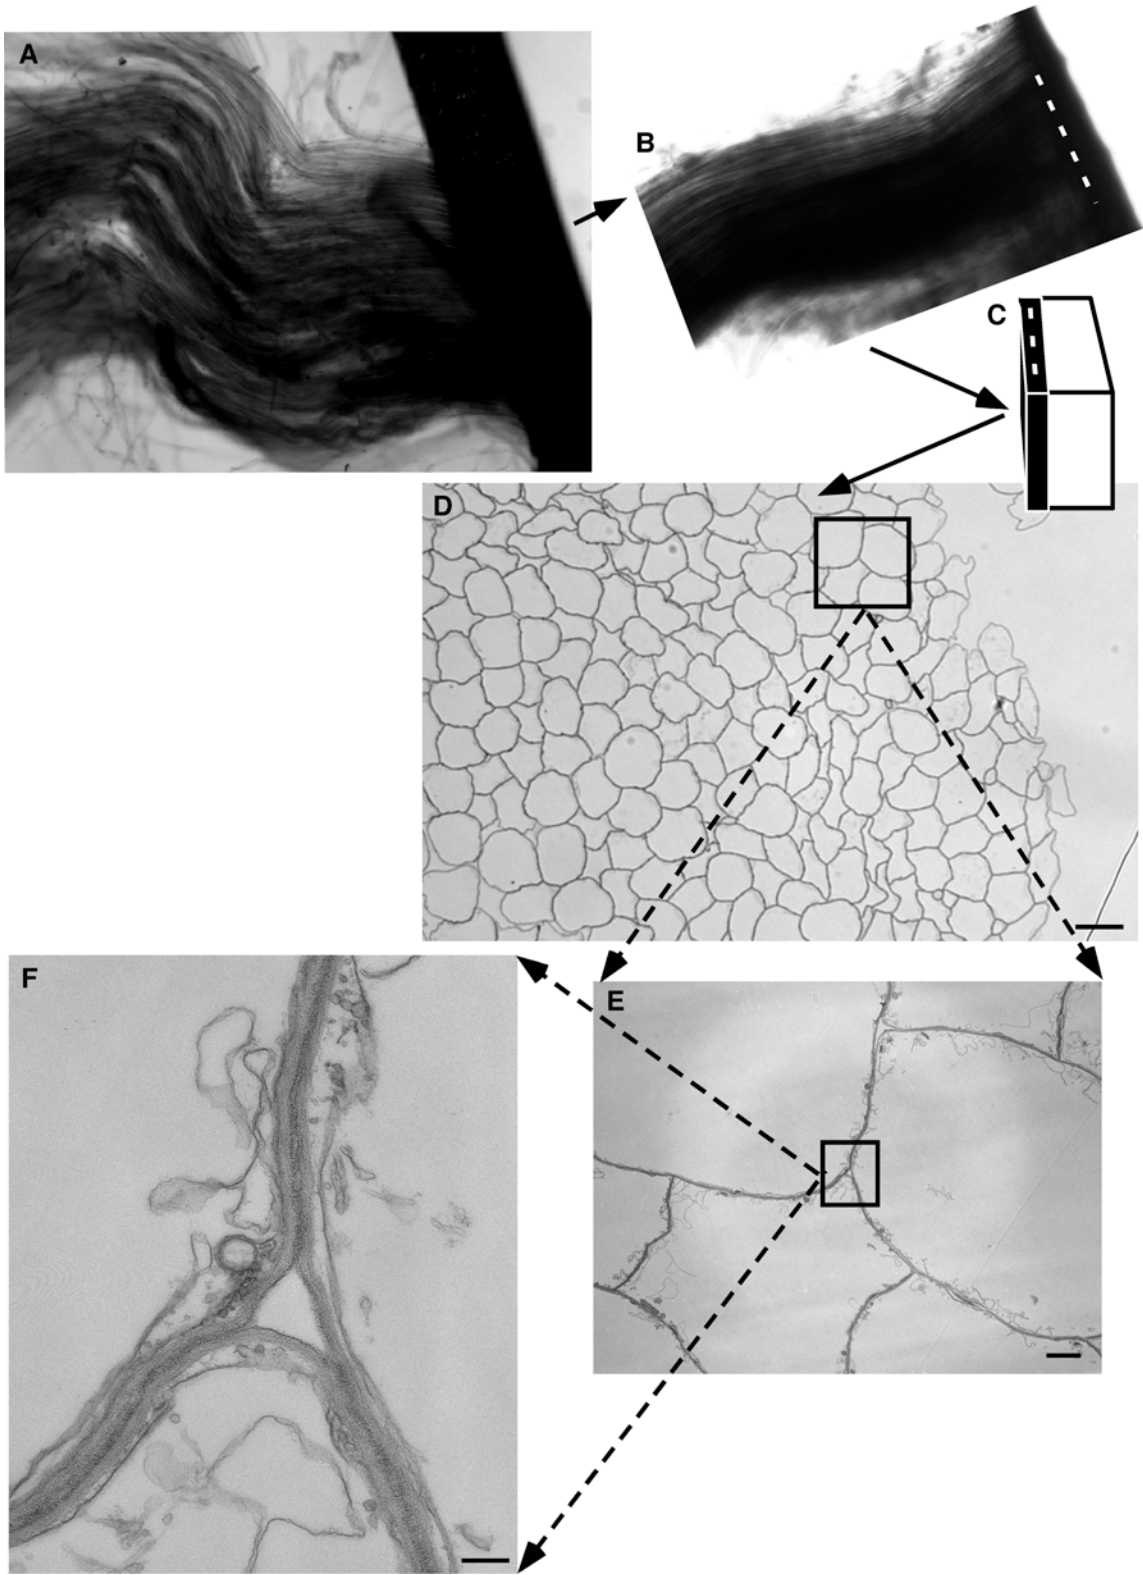



**Figure S2.** Micrographs of 15 DPA fiber showing how fiber bundle cross-sections were generated. Light micrographs are shown in (A, B, D), (C) shows a diagram of one of the technical steps, and (E and F) show TEM micrographs. The micrograph in (A) shows a flat-embedded fiber bundle containing many fibers running in parallel to the plane of the embedding resin. From such a flat-embedded sample, a piece of resin plus fiber (B) was cut out with a razor blade. (The thick black line on the right side in (A) indicates the position of a razor cut.) The rectangular piece of resin in (B), containing the fiber bundle lying in the plane of the resin (black mass), was glued vertically to the side of a blank resin block (symbolized by the white rectangle) as diagrammed in (C). By this action, the area marked by the dashed line in (B) became oriented parallel to the block face (see dashed line in C), so that fibers in the bundle could be cross-sectioned. A thick section of a cross-sectioned bundle of fiber viewed in the light microscope after staining with Toluidine Blue is shown in (D). Next, thin sections were taken for TEM observation, with the boxed areas shown at successively higher magnification in (E) and (F). (E) shows parts of eight joined fibers, whereas (F) shows three joined fibers within the larger group. In (F), the corner between three fibers is empty of CFML material, but fibers are more frequently completely joined at corners as in Figure 1B. Bars in: (D) = 25  $\mu\text{m}$ ; (E) = 3  $\mu\text{m}$ ; (F) = 300 nm.

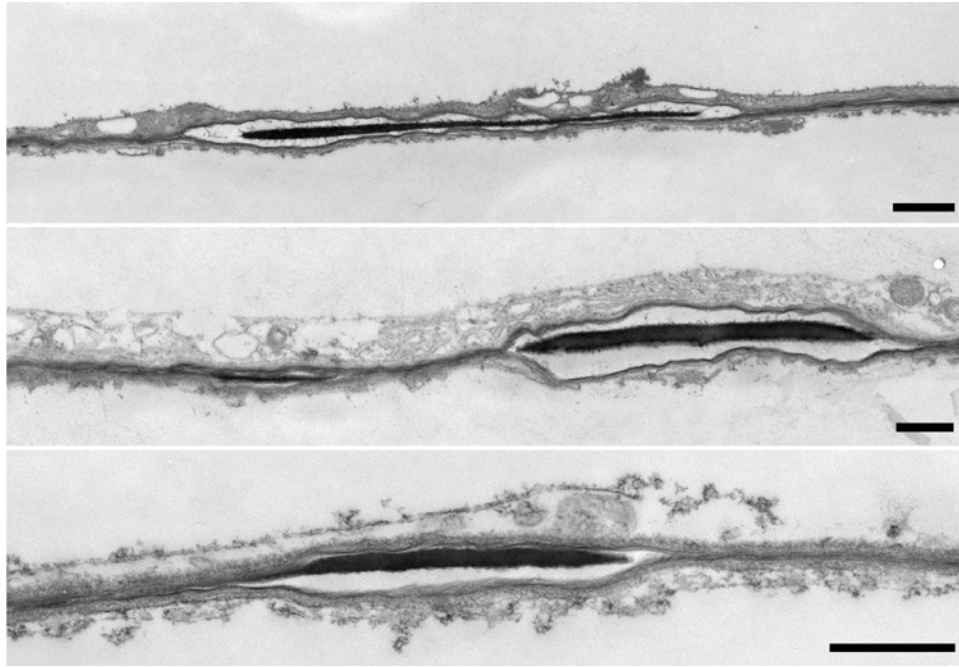

**Figure S3.** TEM views of CFML-filled bulges between 15 DPA fibers observed in longitudinal orientation. Each of the three micrographs shows parts of two fibers, with the coherent wall of each fiber pair in the middle of the micrograph. Sometimes, as shown here, the CFML material (stained darkly above) separated from the primary walls during specimen preparation, whereas in other cases it filled the space entirely. (See also Fig. 1F and Fig. 3.) All bars are 1  $\mu\text{m}$ .

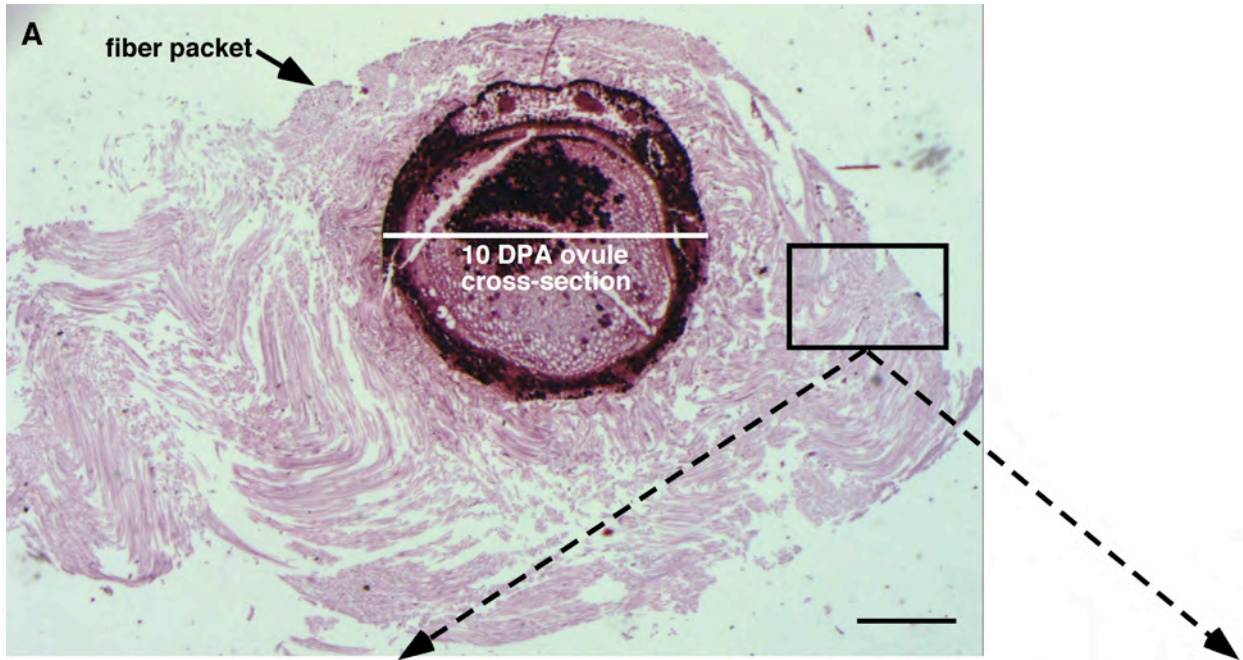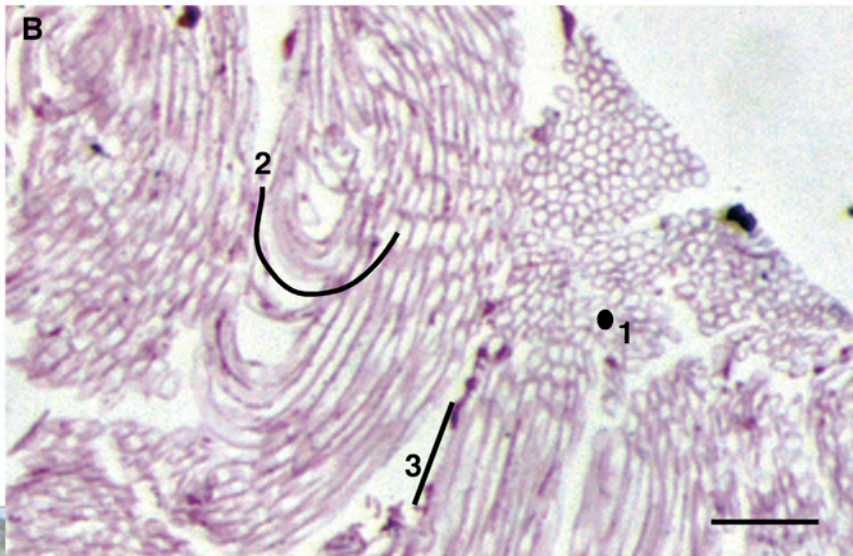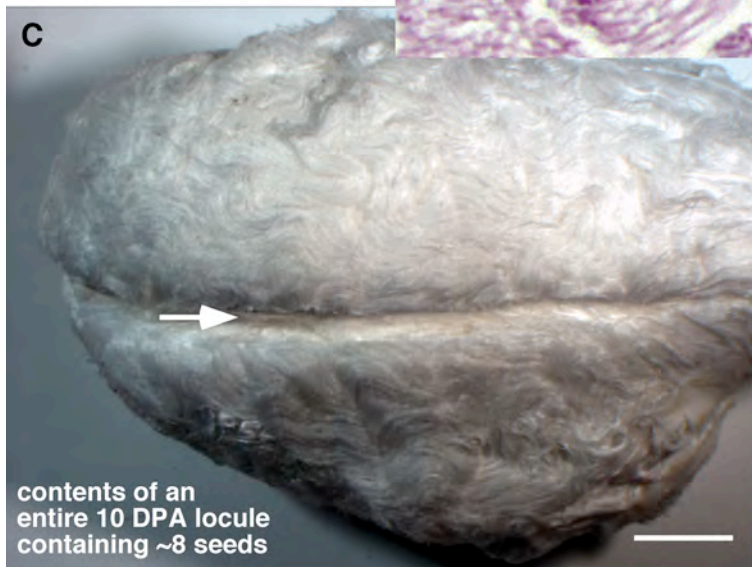

**Figure S4.** Images showing the packing of fiber around a developing ovule and within a locule at 10 DPA. **(A)** A higher magnification micrograph (taken using a compound microscope) of the cross-sectioned ovule in Figure 2F surrounded by a packet of its own fiber (stained with Safranin O). **(B)** The boxed area in A showed bundled fiber within the fiber packet with three major patterns (highlighted with black shapes and numbers) relative to the plane of the section: 1, perpendicular, so that fiber cross-sections were revealed; 2, in arcs that mimicked those in the upper fiber layer appressed to the boll wall shown in C and Figure 2G; and 3, parallel, so that fiber longitudinal sections were revealed. Although some fiber separation and loosening of the fiber packet occurred (see A, lower left side), the specialized protocol for paraffin histology (Supplemental Protocol S3) preserved many regions of fiber bundling and organized packing. This image was processed using the Filter/Sharpen/Unsharp Mask in Adobe Photoshop CS2 in order to increase the contrast and clarity of the fiber patterns. **(C)** A micrograph taken using a dissecting microscope of the seed/fiber contents of an entire locule that was removed from the boll, frozen in slushed nitrogen, then freeze dried. The ovule/fiber mass retained its original shape, as emphasized by the indentation created by the suture line (where the boll wall splits upon opening) running down the middle (arrow). The surface of the excised ovule/fiber tissue, which was appressed to the inner boll wall in situ, showed the tight organization of fiber in wave-like patterns as also observed within the boll by cryo-FE-SEM. The waves can be seen more clearly when the image is enlarged two fold on the computer screen. The bar in A = 500  $\mu\text{m}$ , the bar in B = 100  $\mu\text{m}$ , and the bar in C = 2 mm.

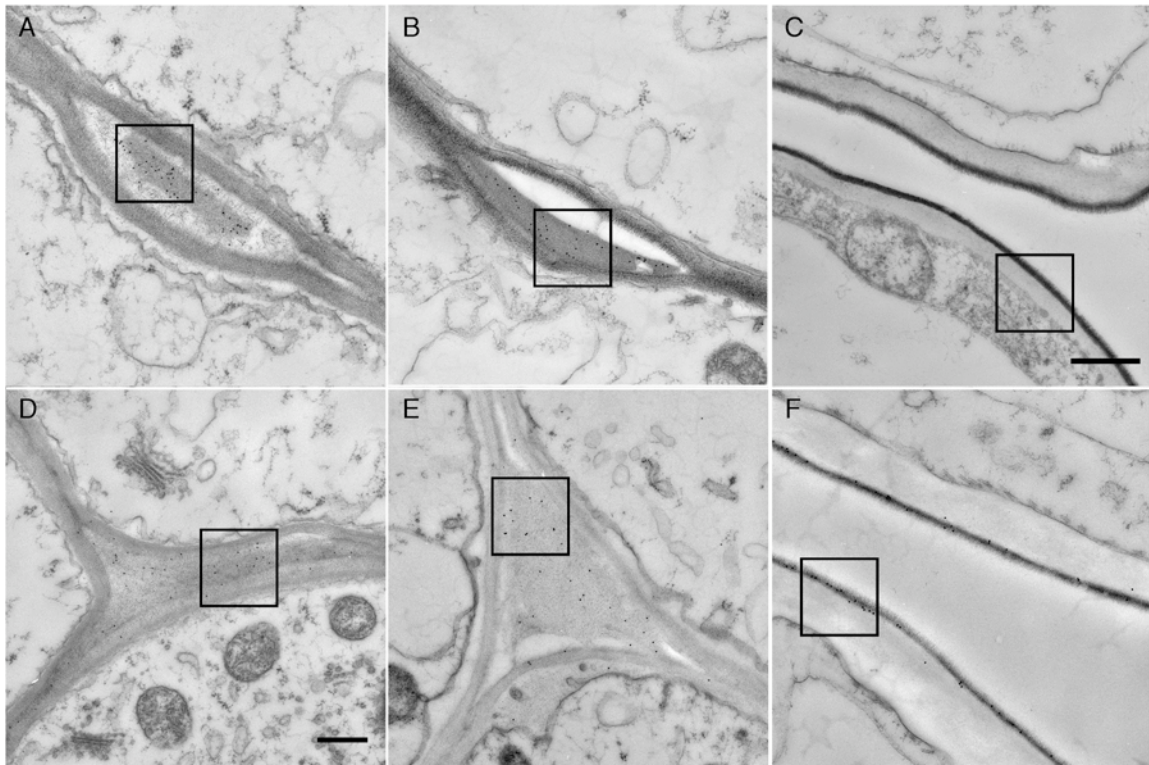

**Figure S5.** Broader TEM views of fibers immunolabeled in Figure 3. The boxed areas were excerpted to form Figure 3, D to I, and the legend of Figure 3 contains information about age of fibers and probes used. The gold label becomes more visible when the figure is enlarged 2 to 3 fold on the computer screen. Stronger immunolabeling occurred in regions where the CFML material was more spread out in bulges or at the meeting point of three fibers, similarly to data from red clover (*Trifolium pratense* L.) (Moore and Stahelin 1988). Bars in: (C) = 600 nm for A, B, C, and F; and (D) = 600 nm for D and E.
